# Supplementary material
Source: Elsevier journal article supplement (https://comptes-rendus.academie-sciences.fr/geoscience/article/10.1016/j.crte.2015.05.007/file/attach/mmc1.pdf)
Supplement: mmc1 [file mmc1.pdf]

Table S1. Major ions concentration in the WACB aquifer

|           | Distance <sup>a</sup> | T    | Eh   | pH   | Ba <sup>2+</sup> | Ca <sup>2+</sup> | Mg <sup>2+</sup> | K <sup>+</sup> | Rb <sup>+</sup> | Si  | Na <sup>+</sup> | Cl <sup>-</sup> | HCO <sub>3</sub> <sup>-</sup> <sub>b</sub> | SO <sub>4</sub> <sup>2-</sup> |
|-----------|-----------------------|------|------|------|------------------|------------------|------------------|----------------|-----------------|-----|-----------------|-----------------|--------------------------------------------|-------------------------------|
|           | (km)                  | (°C) |      |      |                  |                  |                  | (μmol/L)       |                 |     |                 |                 |                                            |                               |
| <b>S1</b> | 0                     | 18.3 | 80   | 8.42 | 109              | 5364             | 2592             | 742            | 351             | 377 | 2306            | 959             | 4023                                       | 6998                          |
| <b>W1</b> | 10                    | 15.4 | -140 | 7.18 | 1617             | 399              | 329              | 153            |                 | 135 | 6134            | 254             | 8535                                       |                               |
| <b>W2</b> | 22                    | 13.7 | -168 | 7.18 | 2418             | 798              | 617              | 179            | 59              | 132 | 10005           | 197             | 15187                                      |                               |
| <b>W3</b> | 30                    | 19.2 | -170 | 7.1  | 3277             | 973              | 700              | 256            | 105             | 150 | 10266           | 197             | 15725                                      |                               |
| <b>W4</b> | 48                    | 21.7 | -222 | 7.87 | 2.519            | 749              | 370              | 128            |                 | 150 | 11919           | 197             | 17639                                      |                               |
| <b>W5</b> | 53                    | 20.1 | -170 | 7.64 | 3131             | 649              | 370              | 179            | 82              | 174 | 1131            | 200             | 15600                                      |                               |
| <b>W6</b> | 76                    | 26   | -161 | 7.46 | 3583             | 574              | 329              | 205            | 94              | 196 | 12789           | 200             | 18013                                      |                               |
| <b>W7</b> | 98                    | 21.9 | -154 | 7.6  | 3422             | 424              | 329              | 205            | 59              | 196 | 26797           | 508             | 33445                                      |                               |
| <b>W8</b> | 101                   | 20.5 | -166 | 7.62 | 2825             | 424              | 329              | 179            |                 | 150 | 24056           | 480             | 30127                                      |                               |
| <b>W9</b> | 102                   | 19.6 | -165 | 7.98 | 2017             | 99               | 247              | 153            | 59              | 167 | 23317           | 423             | 30640                                      |                               |

<sup>a</sup> Reported relative to S1 after projecting the position of S1 due south to intersect the flowpath defined by W1 - W9 (Fig. 1). See text for explanation.

<sup>b</sup> HCO<sub>3</sub> ≈ A<sub>T</sub> = (HCO<sub>3</sub><sup>-</sup> + 2CO<sub>3</sub><sup>2-</sup>)
